# Supplementary material
Source: PubMed Central journal article supplement (PMC1563784)
Supplement: jvirol_80_16_7984__1.pdf [file jvirol_80_16_7984__1.pdf]

**Table I.** Data collection and structure determination statistics

|                                       | Bristol NSP2 (NSP2c)                                            | SA11 NSP2 (NSP2a)                                               |
|---------------------------------------|-----------------------------------------------------------------|-----------------------------------------------------------------|
| <i>Data collection</i>                |                                                                 |                                                                 |
| Wavelength (Å)                        | 0.98                                                            | 1.3808                                                          |
| Space group                           | I4                                                              | I422                                                            |
| Cell parameters                       | a=b=134.181 Å,<br>c=112.294 Å<br>$\alpha=\beta=\gamma=90^\circ$ | a=b=107.635 Å,<br>c=150.338 Å<br>$\alpha=\beta=\gamma=90^\circ$ |
| Number of unique reflections          | 23468                                                           | 40588                                                           |
| Resolution range (Å)                  | 50-2.8 (2.9-2.8)                                                | 54-2.07(2.18-2.07)                                              |
| Completeness of data (%)              | 99.9 (100)                                                      | 100(100)                                                        |
| Redundancy                            | 7.6 (7.6)                                                       | 6.8(5.3)                                                        |
| $R_{\text{merge}}$ (%)                | 5.4 (28.6)                                                      | 10.5(44.5)                                                      |
| $I/\sigma$                            | 30.5 (5.6)                                                      | 14.3(2.6)                                                       |
| <i>Refinement statistics</i>          |                                                                 |                                                                 |
| Maximal resolution (Å)                | 2.8 (2.9-2.8)                                                   | 2.2 (2.28-2.20)                                                 |
| No. of atoms                          | 4874                                                            | 2505                                                            |
| Monomers per asymmetric unit          | 2                                                               | 1                                                               |
| $R$ -factor (%)                       | 22.9 (33.7)                                                     | 23.3 (27.6)                                                     |
| $R_{\text{free}}$ (%)                 | 28.1 (35.7)                                                     | 26.8 (32.8)                                                     |
| Average $B$ -factor (Å <sup>2</sup> ) | 46.9                                                            | 32.9                                                            |
| R.m.s.d. bond length (Å)              | 0.007                                                           | 0.006                                                           |
| R.m.s.d. bond angles (deg)            | 1.28                                                            | 1.12                                                            |

Values in parentheses are for the highest resolution shell.
